# Supplementary material for: Effects of Naringin on Postharvest Storage Quality of Bean Sprouts
Source: MDPI journal article supplement (doi:10.3390/foods11152294), 2022-08-01
Supplement: s1 [file s1]

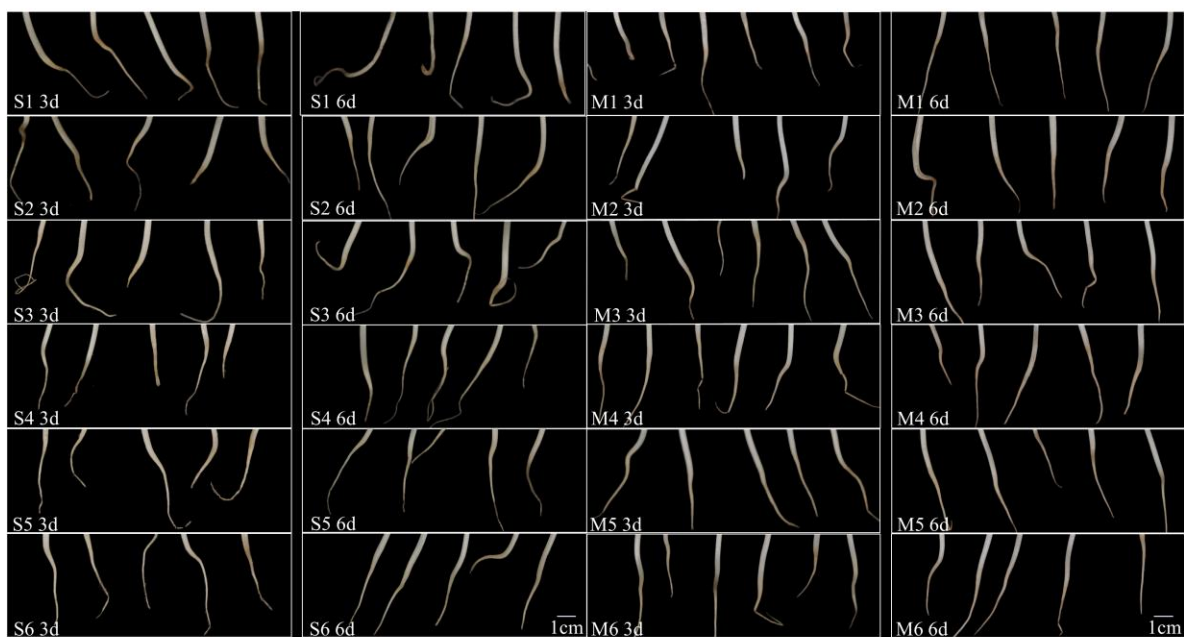

**Figure S1.** The characterization of soybean sprouts and mung bean sprouts sprayed with different concentrations of naringin after three and six days of storage at 4 °C.
